# Supplementary material for: A hypochlorite-activatable persistent luminescence nanoprobe for assisted tumor resection
Source: Royal Society of Chemistry journal article supplement (doi:10.1039/d3qm01308a), 2024-01-01
Supplement: d3qm01308a1.pdf [file d3qm01308a1.pdf]

1

## Supporting Information for

2 **Hypochlorite-Activatable Persistent Luminescence Nanoprobe for**

3

## **Assisted Tumor Resection**

4 Zhouyu Zhang<sup>a</sup>, Zi-Jin Wei<sup>a</sup>, Mengjie Sun<sup>a</sup>, Zichao Yan<sup>a</sup>, Chang Yin<sup>a</sup>, Wei Wang<sup>a\*</sup>,  
5 and Zhi Yuan<sup>a,b\*</sup>

6 a. Key Laboratory of Functional Polymer Materials of the Ministry of Education,  
7 Institute of Polymer Chemistry, College of Chemistry, Nankai University, Tianjin  
8 300071, China

9 b. Collaborative Innovation Center of Chemical Science and Engineering, Nankai  
10 University, Tianjin 300071, China

11 \*Corresponding author: Prof. Zhi Yuan, E-mail: zhiy@nankai.edu.cn

12 Prof. Wei Wang, E-mail: duruo@nankai.edu.cn

13

14

## 15 1. Experimental Procedures

16 **Calculation of A690 adsorption capacity.** The amount of A690 adsorbed on  
17 ZGC@P was calculated by using UV-Vis spectrophotometry. Firstly, 1 mL aqueous  
18 solution of A690 (1 mg/mL, 1% DMSO) was diluted to 10 mL and measured the  
19 absorbance at 690 nm and labeled it as  $A_0$ . After adding 10 mg of ZGC@P and allowing  
20 complete adsorption, the supernatant was collected after centrifugation at 12,000 rpm  
21 and measured the absorbance at 690 nm and labeled it as  $A_1$ .

$$22 \quad m_a = \left(1 - \frac{A_1}{A_0}\right) m_{A690}$$

23 Where  $m_{A690}$  was the mass before adsorption,  $m_a$  was the mass of A690 adsorbed  
24 by ZGC@P.

## 25 2. Supporting Figures

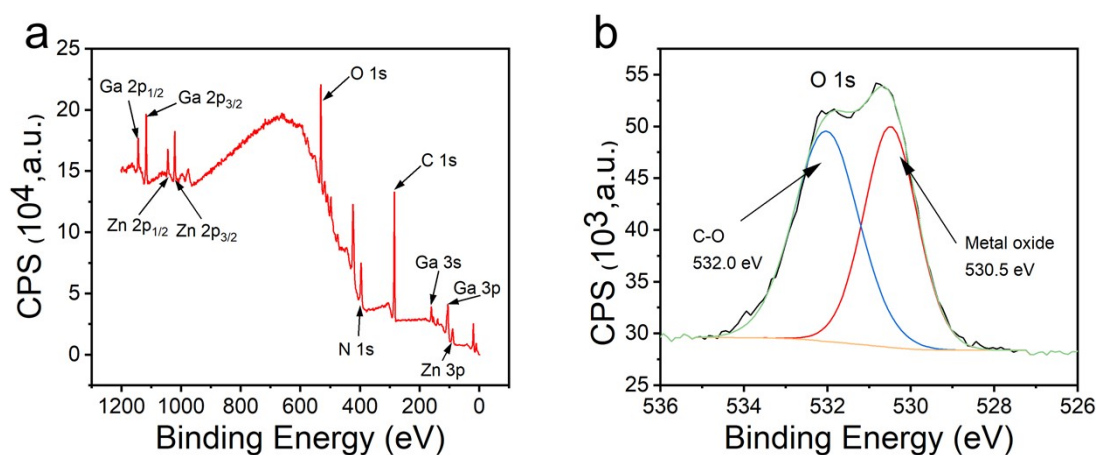

26  
27 **Figure S1.** (a) XPS wide spectra of ZGC@P&A. (b) XPS O 1s spectra of  
28 ZGC@P&A

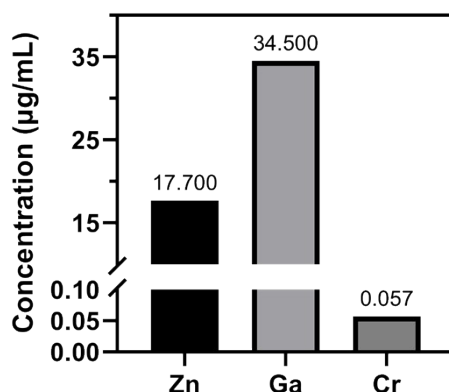

29  
30 **Figure S2.** ICP outcomes of metallic elements concentrations.  
31

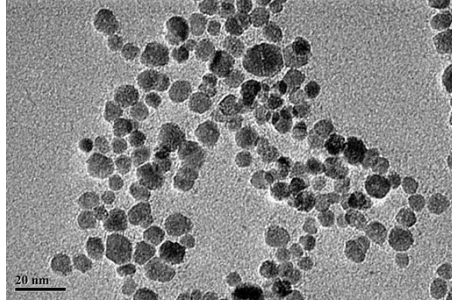

32

33 **Figure S3.** TEM image of ZGC@P&A (scale bar = 20 nm).

34

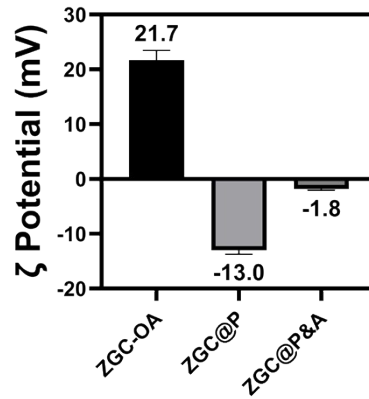

35

36 **Figure S4.** Surface potential of ZGC-OA, ZGC@P and ZGC@P&A.

37

38

39

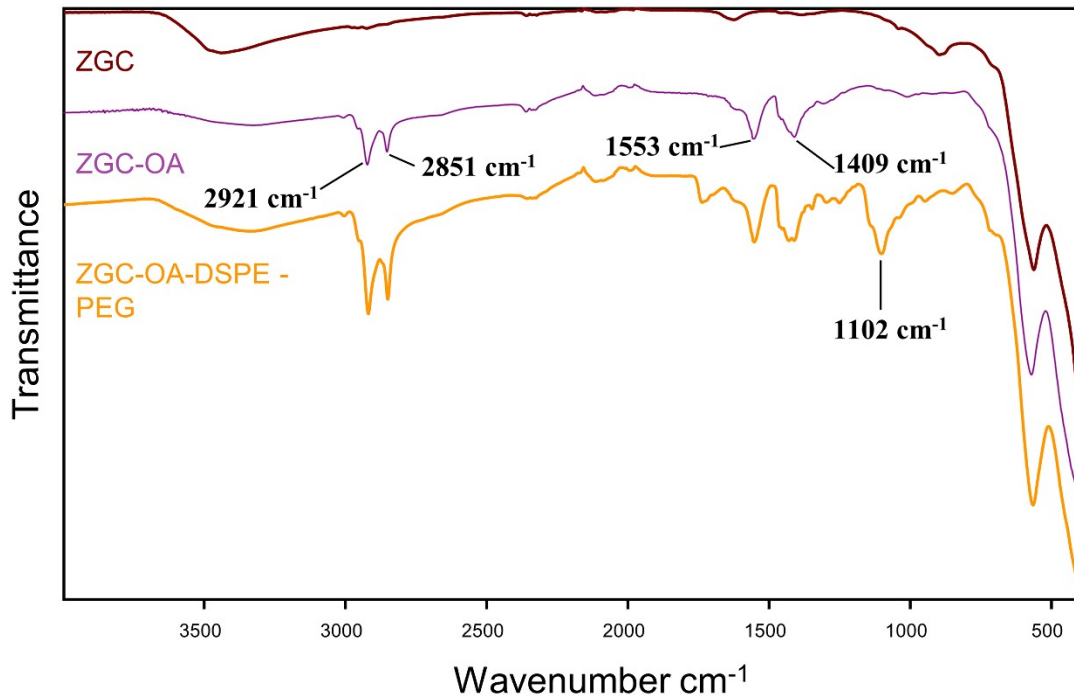

40

41 **Figure S5.** Infrared spectroscopy of various ZGC PLNPs.

42

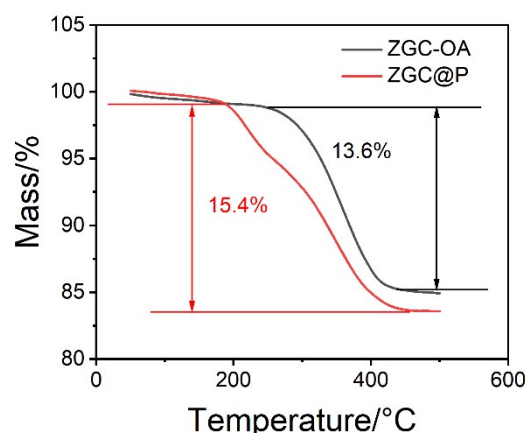

43

44 **Figure S6.** Thermogravimetric analysis of ZGC@P.

45

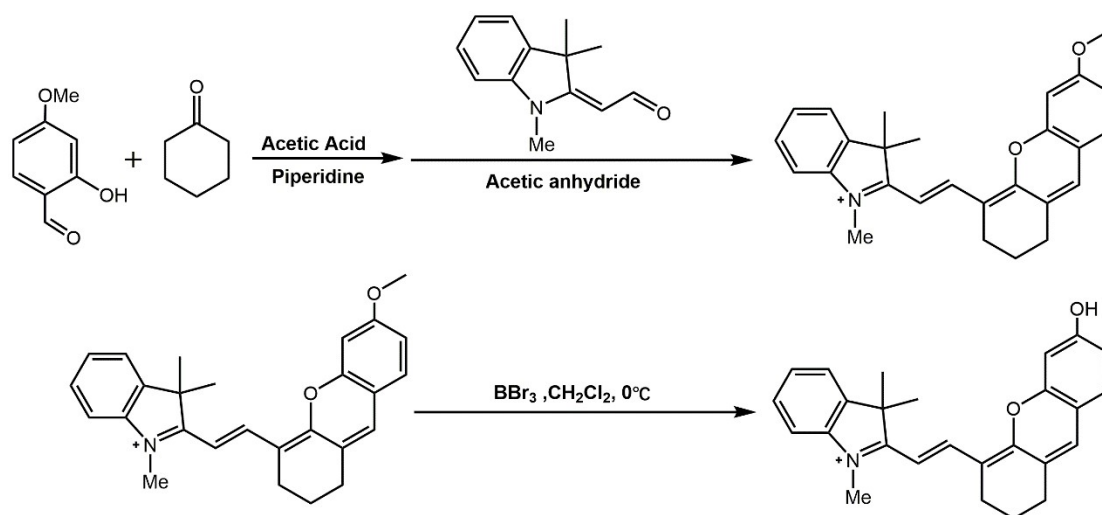

46

47 **Figure S7.** Synthetic processes of A690.

48

49

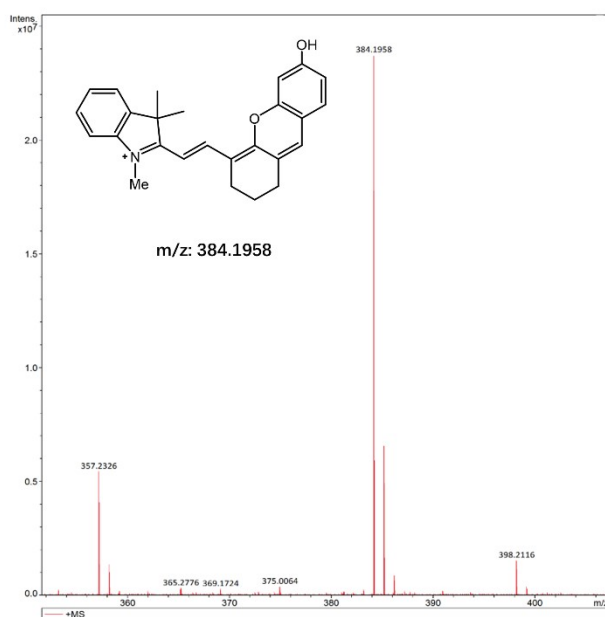

50

51 **Figure S8.** Mass spectrum of compound A690 in dichloromethane.

52

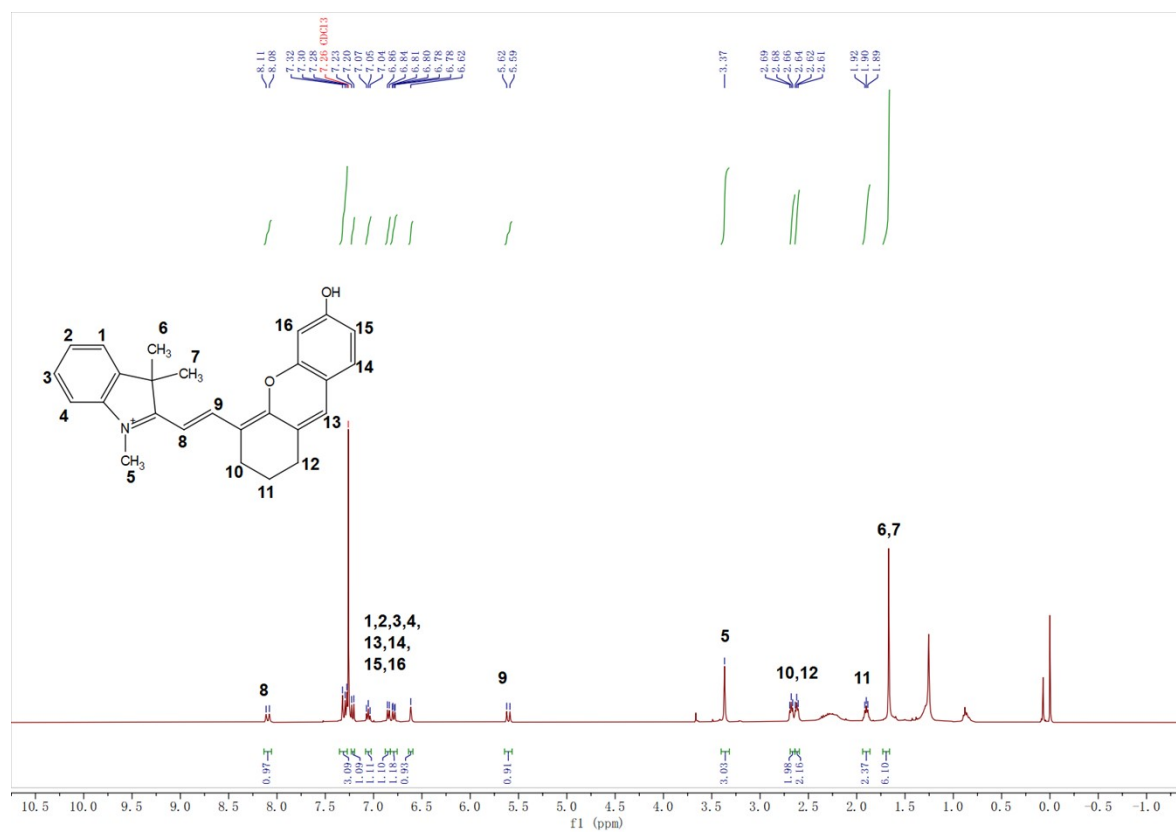

53

54 **Figure S9.**  $^1\text{H}$  NMR spectrum of A690 in  $\text{CDCl}_3$ .

55

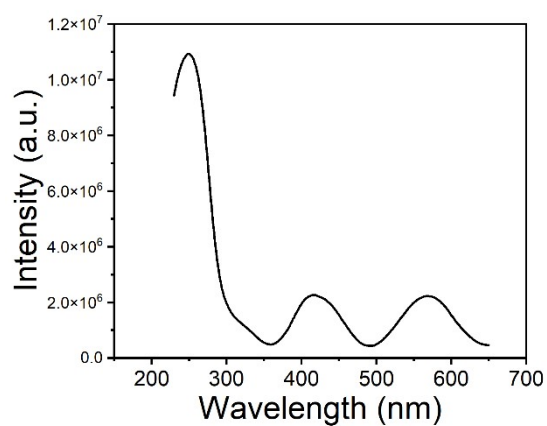

56

57 **Figure S10.** Excitation ( $\lambda_{em} = 695$  nm) spectra of ZGC@P.

58

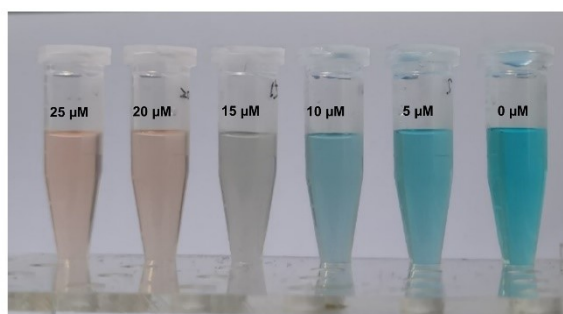

59

60 **Figure S11.** The color photos of A690 upon gradient concentrations of  $\text{ClO}^-$  ranging  
61 from 0 to 25  $\mu\text{M}$ .

62

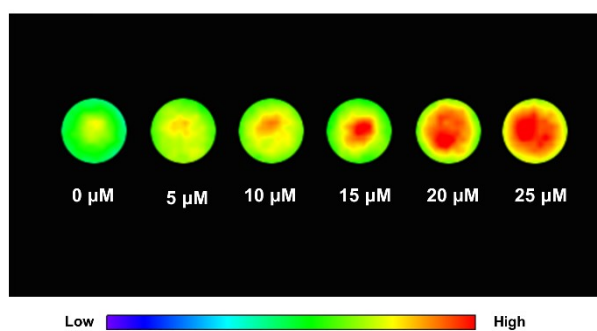

63

64 **Figure S12.** The PersL image of ZGC@P&A upon gradient concentrations of  $\text{ClO}^-$   
65 ranging from 0 to 25  $\mu\text{M}$ .

66

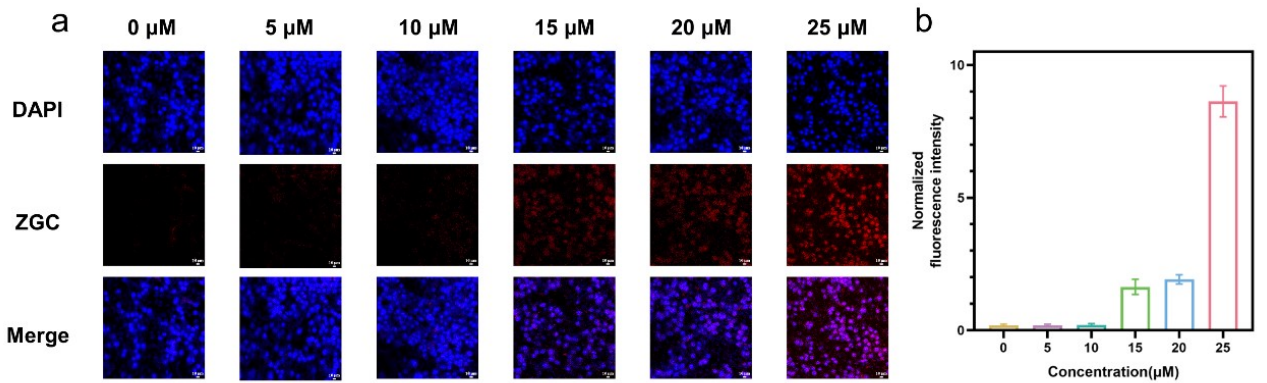

67

68 **Figure S13.** (a) Confocal laser-scanning microscopic photograph of ZGC@P&A  
 69 exogenous response performances *in vitro* (scale bar = 10 μm). (b) Normalized  
 70 fluorescence intensity of corresponding ZGC@P&A image.

71

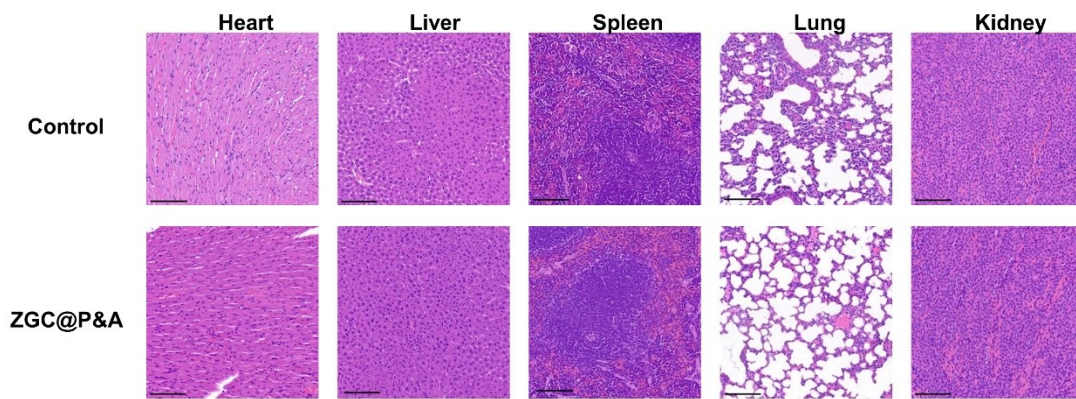

72

73 **Figure S14.** H&E staining of the main organs slice. Scale bar: 100 μm

74

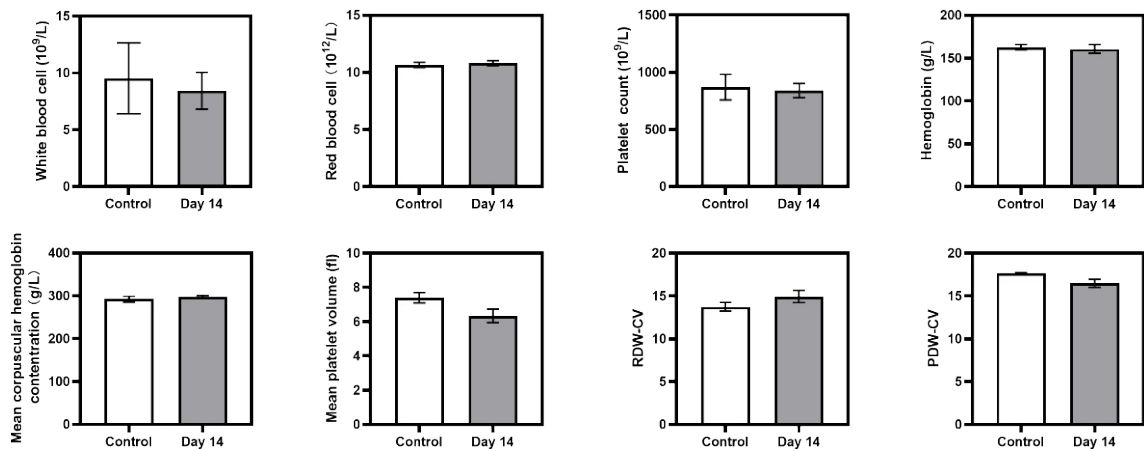

75

76 **Figure S15.** Hematology data of Balb/c mice treated with ZGC@P&A (2 mg/mL, 200  
 77 μL) at 14 days post-injection.

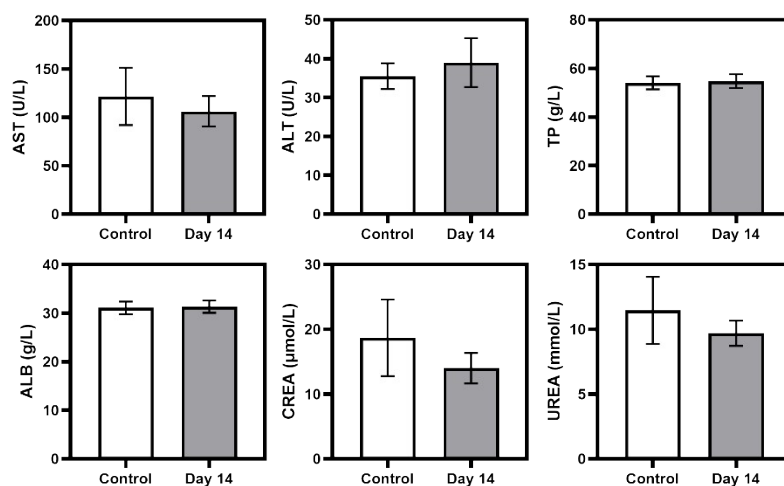

79

80 **Figure S16.** Blood biochemistry data of Balb/c mice treated with ZGC@P&A (2  
81 mg/mL, 200 µL) at 14 days post-injection.

82
